# Supplementary material for: Optimization of Bioactive Phenolics Extraction and Cosmeceutical Activity of Eco-Friendly Polypropylene-Glycol–Lactic-Acid-Based Extracts of Olive Leaf
Source: MDPI journal article supplement (doi:10.3390/molecules27020529), 2022-01-14
Supplement: s1 [file s1]

**Table S1.** Physicochemical properties of the prepared solvents.

| Standard | Run | $\rho$<br>(g/cm <sup>3</sup> ) | $\eta$<br>(Pas) | pH   |
|----------|-----|--------------------------------|-----------------|------|
| 14       | 1   | 1.040                          | 0.0688          | 2.6  |
| 16       | 2   | 1.032                          | 0.0031          | 1.83 |
| 4        | 3   | 1.014                          | 0.0027          | 2.25 |
| 3        | 4   | 1.033                          | 0.0145          | 2.68 |
| 11       | 5   | 1.045                          | 0.0144          | 2.16 |
| 7        | 6   | 1.038                          | 0.0603          | 3.13 |
| 6        | 7   | 1.032                          | 0.0864          | 3.26 |
| 12       | 8   | 1.045                          | 0.0144          | 2.16 |
| 2        | 9   | 1.038                          | 0.0517          | 3.15 |
| 10       | 10  | 1.045                          | 0.0144          | 2.16 |
| 13       | 11  | 1.035                          | 0.1146          | 2.35 |
| 5        | 12  | 1.014                          | 0.0027          | 2.25 |
| 9        | 13  | 1.020                          | 0.0999          | 2.32 |
| 15       | 14  | 1.046                          | 0.0984          | 2.5  |
| 8        | 15  | 1.020                          | 0.0999          | 2.32 |
| 1        | 16  | 1.011                          | 0.0835          | 2.31 |

**Table S2.** Relationship between the concentration of the target compounds and the HM/SR.

| Content      | Technique | Solvent | Equation              | $R^2$  |
|--------------|-----------|---------|-----------------------|--------|
| Total phenol | MSAE      | A       | $y = 20.470x + 1.100$ | 0.9964 |
|              | UAE       | A       | $y = 7.500x + 1.241$  | 0.9335 |
|              | MSAE      | B       | $y = 28.250x + 0.058$ | 0.9825 |
|              | UAE       | B       | $y = 11.190x + 0.755$ | 0.9920 |
| Oleuropein   | MSAE      | A       | $y = 3.871x + 0.344$  | 0.9990 |
|              | UAE       | A       | $y = 0.969x + 0.392$  | 0.9163 |
|              | MSAE      | B       | $y = 7.779x + 0.034$  | 0.9919 |
|              | UAE       | B       | $y = 6.247x - 0.013$  | 0.9976 |
| Verbascoside | MSAE      | A       | $y = 1.041x - 0.008$  | 0.9953 |
|              | UAE       | A       | $y = 0.296x + 0.068$  | 0.9864 |
|              | MSAE      | B       | $y = 0.922x + 0.022$  | 0.9997 |
|              | UAE       | B       | $y = 1.319x - 0.013$  | 0.9937 |

MSAE = magnetic stirrer assisted extraction; UAE = ultrasound assisted extraction; Solvent A: 10% polypropylene glycol, 89% water, 1% lactic acid); Solvent B (28.6% polypropylene glycol, 63.6% water, 7.8% lactic acid).  $y$  = Concentration of the target compound (mg/mL),  $x$  = Herbal material/solvent ratio (g herbal material/10 g solvent).

**Table S3.** Relationship between yield (%) of the target compounds and the HM/SR.

| Yield        | Technique | Solvent | Equation                                           | R <sup>2</sup> |
|--------------|-----------|---------|----------------------------------------------------|----------------|
| Total phenol | MSAE      | A       | $y = 18.570 \times x^2 - 32.670 \times x + 20.420$ | 0.9528         |
|              | UAE       | A       | $y = 9.449 \times x^2 - 15.370 \times x + 8.498$   | 0.9987         |
|              | MSAE      | B       | $y = -5.640 \times x^2 - 5.408 \times x + 16.875$  | 0.9366         |
|              | UAE       | B       | $y = 4.907 \times x^2 - 13.120 \times x + 10.690$  | 0.9928         |
| Oleuropein   | MSAE      | A       | $y = 7.394 \times x^2 - 10.810 \times x + 5.194$   | 0.9754         |
|              | UAE       | A       | $y = -5.351 \times x^2 - 7.009 \times x + 2.610$   | 0.9554         |
|              | MSAE      | B       | $y = 2.934 \times x^2 - 6.511 \times x + 5.887$    | 0.9668         |
|              | UAE       | B       | $y = 3.238 \times x^2 - 5.971 \times x + 4.540$    | 0.9464         |
| Verbascoside | MSAE      | A       | $y = 0.103 \times x^2 - 0.513 \times x + 0.631$    | 0.9141         |
|              | UAE       | A       | $y = 1.031 \times x^2 - 1.350 \times x + 0.530$    | 0.9241         |
|              | MSAE      | B       | $y = 0.501 \times x^2 - 1.004 \times x + 0.794$    | 0.9800         |
|              | UAE       | B       | $y = 0.795 \times x^2 - 1.337 \times x + 0.949$    | 0.9564         |

MSAE = magnetic stirrer assisted extraction; UAE = ultrasound assisted extraction; Solvent A: 10% polypropylene glycol, 89% water, 1% lactic acid); Solvent B (28.6% polypropylene glycol, 63.6% water, 7.8% lactic acid). y = yield of the target compound (%), x = Herbal material/solvent ratio (g herbal material/10 g solvent).

**Table S4.** Relationship between the extraction parameters and the extended herbal extract/solvent ratio (HM/SR) (1.0-1.6 g/10 g solvent) in magnetic stirrer assisted extraction using the solvent B.

| Extraction parameter         | Value of extraction parameter | HM/SR (g/10 g solvent) | Equation*                     | R <sup>2</sup> * |
|------------------------------|-------------------------------|------------------------|-------------------------------|------------------|
| Total phenol content (mg/mL) | 27.90                         | 1.0                    | $y = 25.090 \times x + 1.219$ | 0.9912           |
|                              | 31.40                         | 1.2                    |                               |                  |
|                              | 35.07                         | 1.4                    |                               |                  |
|                              | 40.71                         | 1.6                    |                               |                  |
| Oleuropein content (mg/mL)   | 7.57                          | 1.0                    | $y = 7.737 \times x + 0.057$  | 0.9967           |
|                              | 9.77                          | 1.2                    |                               |                  |
|                              | 10.92                         | 1.4                    |                               |                  |
|                              | 12.22                         | 1.6                    |                               |                  |
| Verbascoside content (mg/mL) | 0.93                          | 1.0                    | $y = 0.956 \times x + 0.009$  | 0.9982           |
|                              | 1.20                          | 1.2                    |                               |                  |
|                              | 1.35                          | 1.4                    |                               |                  |
|                              | 1.53                          | 1.6                    |                               |                  |

\*Includes the HM/RS values of 0.2-0.8. Extended weight of the herbal material (g) extracted by 10 g of the solvent –MSAE = magnetic stirrer assisted extraction; - UAE = ultrasound assisted extraction; Solvent A: 10% polypropylene glycol, 89% water, 1% lactic acid; Solvent B (28.6% polypropylene glycol, 63.6% water, 7.8% lactic acid).  $y$  = Concentration of the target compound (mg/mL),  $x$  = Herbal material/solvent ratio (g herbal material/10 g solvent).

**Table S5.** Volume of the prepared extracts.

| Extraction technique | Solvent | HM/SR (g/10 g solvent) | V extract (mL) |
|----------------------|---------|------------------------|----------------|
| MSAE                 | A       | 0.1                    | 6.04           |
|                      |         | 0.2                    | 5.27           |
|                      |         | 0.4                    | 4.39           |
|                      |         | 0.6                    | 3.54           |
|                      |         | 0.8                    | 2.74           |
| UAE                  | A       | 0.1                    | 5.25           |
|                      |         | 0.2                    | 3.57           |
|                      |         | 0.4                    | 3.20           |
|                      |         | 0.6                    | 3.02           |
|                      |         | 0.8                    | 2.49           |
| MSAE                 | B       | 0.1                    | 6.34           |
|                      |         | 0.2                    | 5.47           |
|                      |         | 0.4                    | 4.98           |
|                      |         | 0.6                    | 4.01           |
|                      |         | 0.8                    | 3.19           |
|                      |         | 1.0                    | 2.47           |
|                      |         | 1.2                    | 1.85           |
|                      |         | 1.4                    | 1.55           |
| UAE                  | B       | 1.6                    | 1.26           |
|                      |         | 0.1                    | 5.94           |
|                      |         | 0.2                    | 5.24           |
|                      |         | 0.4                    | 4.50           |
|                      |         | 0.6                    | 3.72           |
|                      |         | 0.8                    | 2.77           |

MSAE = magnetic stirrer assisted extraction; UAE = ultrasound assisted extraction; Solvent A: 10% polypropylene glycol, 89% water, 1% lactic acid); Solvent B (28.6% polypropylene glycol, 63.6% water, 7.8% lactic acid).
